# Supplementary material
Source: Springer Nature journal article supplement (https://www.springermedizin.de/resource/supplementary/12962_2009_114_MOESM2_ESM.pdf/9572186)

## IPD Income & Utilization of *Shushastha*

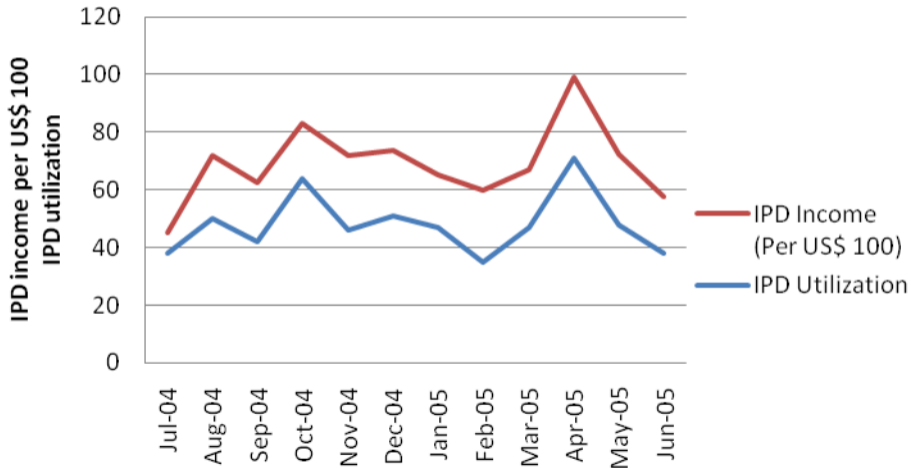

Supplement: MOESM2 [file 9572186]
